# Supplementary material
Source: PubMed Central journal article supplement (PMC1266174)
Supplement: 374-381-s1.pdf [file 374-381-s1.pdf]

## Supplementary information

Supplementary table 1. Summary of papers.

| Author(s)                              | Aim                                                                                                                                      | Study design                                                                                                                                                                                        | Outcome measures                                                                                                                                                   | n                                                                                           | Selected access outcomes                                                                                                                                                                                                                                                                                                                                                                                                                                                                                                                                                                                 | Study limitations                                                                                                                                                                                         | Study quality |
|----------------------------------------|------------------------------------------------------------------------------------------------------------------------------------------|-----------------------------------------------------------------------------------------------------------------------------------------------------------------------------------------------------|--------------------------------------------------------------------------------------------------------------------------------------------------------------------|---------------------------------------------------------------------------------------------|----------------------------------------------------------------------------------------------------------------------------------------------------------------------------------------------------------------------------------------------------------------------------------------------------------------------------------------------------------------------------------------------------------------------------------------------------------------------------------------------------------------------------------------------------------------------------------------------------------|-----------------------------------------------------------------------------------------------------------------------------------------------------------------------------------------------------------|---------------|
| <b>Personal medical services (PMS)</b> |                                                                                                                                          |                                                                                                                                                                                                     |                                                                                                                                                                    |                                                                                             |                                                                                                                                                                                                                                                                                                                                                                                                                                                                                                                                                                                                          |                                                                                                                                                                                                           |               |
| Steiner <i>et al</i> (2002)            | To evaluate the extent to which PMS pilots improved quality of care                                                                      | Controlled before-and-after study (questionnaires used: Practice Profile, Mental Health, Elderly Care, Health Authority, GPAS)                                                                      | PMS versus general medical services: change over time                                                                                                              | 19 PMS pilots matched to 23 general medical services                                        | <ul style="list-style-type: none"> <li>➤ Patients rated PMS lower on continuity of care than general medical services (PMS team approach to providing care)</li> <li>➤ Evidence of improved chronic disease management, mental health care and provision of care for elderly</li> </ul>                                                                                                                                                                                                                                                                                                                  | <ul style="list-style-type: none"> <li>➤ Evaluation of first-wave sites only</li> <li>➤ Only sites which had specified a clear quality focus were chosen (results generalisable to this group)</li> </ul> | II            |
| Sibbald <i>et al</i> (2002)            | To investigate the impact of salaried GP contracts on recruitment, retention and GP behaviour and the financial implications for the NHS | Controlled before-and-after study (analysis of contracts, postal questionnaire to all PMS sites)                                                                                                    | Incentive structures, process and outcome of recruitment, impact of salaried GP contracts on workload, quality of care, costs, GP work satisfaction and job stress | 10 general medical services and 10 PMS practices; 12 PMS pilots selected for in-depth study | <ul style="list-style-type: none"> <li>➤ Recruitment success to salaried posts was similar to that achieved by urban practices generally</li> <li>➤ Job satisfaction was equivalent to that for GP principals nationally; salaried GPs were less likely to be stressed but more likely to report problems with poor working conditions, professional isolation</li> <li>➤ List sizes increased at a lower rate in PMS compared with general medical services; doctors in PMS tended to provide shorter consultations and were less likely to prescribe; patient access slightly better in PMS</li> </ul> | <ul style="list-style-type: none"> <li>➤ Evaluation of first-wave sites only</li> </ul>                                                                                                                   | II            |
| Walsh <i>et al</i> (2002)              | To examine the setting up and implementation of the PMS initiative across a range of different organisational forms                      | Case studies (interviews with GPs, nurses, admin/managers; questionnaire sent to GPs; focus groups with older people and mental health service users; patient questionnaires; documentary analysis) | Benefits/problems of PMS over general medical services, waiting times, contract details, financial data, new staff roles, degree of partnership-working            | 14 PMS pilots                                                                               | <ul style="list-style-type: none"> <li>➤ The degree of integration between study sites and other organisations was limited</li> </ul>                                                                                                                                                                                                                                                                                                                                                                                                                                                                    | <ul style="list-style-type: none"> <li>➤ Evaluation of first-wave sites only</li> </ul>                                                                                                                   | III           |
| Carter <i>et al</i> (2002)             | To evaluate the impact of first-wave PMS pilots on access to appropriate health care to those in greatest need                           | Evaluation by case studies (telephone interviews with lead professionals at each site at 12 and 28 months, in-depth analysis in sample of sites, local                                              | Progress towards meeting service objectives, accessibility (satisfaction questionnaire),                                                                           | 41 PMS sites selected for interview; 13 sites for in-depth analysis; three case study       | <ul style="list-style-type: none"> <li>➤ 50% of sites had improved access to care (outreach, open access, community development work)</li> <li>➤ Slow progress in targeting/attracting minority ethnic groups</li> <li>➤ Most of the pilots were concentrated</li> </ul>                                                                                                                                                                                                                                                                                                                                 | <ul style="list-style-type: none"> <li>➤ Evaluation of first-wave sites only</li> <li>➤ Only sites that had specified clear targets to improve access and reduce inequalities were</li> </ul>             | III           |

## Supplementary information

|                               |                                            |                                                                                                                                   |                                                                                                                                         |                 |                                                                                                                                                                              |                                              |     |
|-------------------------------|--------------------------------------------|-----------------------------------------------------------------------------------------------------------------------------------|-----------------------------------------------------------------------------------------------------------------------------------------|-----------------|------------------------------------------------------------------------------------------------------------------------------------------------------------------------------|----------------------------------------------|-----|
|                               |                                            | case studies, economic analysis)                                                                                                  | geographical targeting, economic analysis                                                                                               | sites           | in deprived districts but no evidence suggesting PMS sites were drawing patients from neighbourhoods with highest levels of deprivation                                      | chosen (results generalisable to this group) |     |
|                               |                                            |                                                                                                                                   |                                                                                                                                         |                 | ➤ High level of satisfaction across sites (but not representative of target populations)                                                                                     |                                              |     |
|                               |                                            |                                                                                                                                   |                                                                                                                                         |                 | ➤ Recruitment of salaried GPs in deprived areas remains a problem                                                                                                            |                                              |     |
| Jenkins, Lewis, Gillam (2001) | To evaluate the Isleworth PMS pilot        | Single-site case study (Interviews, Angina Audit, GPAS, Focus groups, Practice Profile Questionnaire, Registration Questionnaire) | Access, interpersonal care, continuity of care, technical care, communication, range of services provided, prescribing, patient profile | One practice    | ➤ Practice staff expressed concerns about ability to balance accessibility and high quality of care (high proportion of patients with complex needs)                         | ➤ Data based on single case study            | III |
|                               |                                            |                                                                                                                                   |                                                                                                                                         |                 | ➤ Patients were satisfied with their correspondence with the receptionist and nursing staff but less satisfied with accessibility of practice and continuity of care offered |                                              |     |
| Jenkins, Lewis, Gillam (2001) | To evaluate the Edith Cavell PMS pilot     | Single-site case study (Interviews, Angina Audit, GPAS, Focus groups, Practice Profile Questionnaire, Registration Questionnaire) | Access, interpersonal care, continuity of care, technical care, communication, range of services provided, prescribing, patient profile | One practice    | ➤ Practice staff expressed growing concern about their abilities to provide high quality care (quality of care was assessed as: variable)                                    | ➤ Data based on single case study            | III |
|                               |                                            |                                                                                                                                   |                                                                                                                                         |                 | ➤ Practice successful in reaching marginalised groups                                                                                                                        |                                              |     |
|                               |                                            |                                                                                                                                   |                                                                                                                                         |                 | ➤ Negotiation of respective roles of nurses and doctors seen as difficult                                                                                                    |                                              |     |
| Jenkins, Lewis, Gillam (2001) | To evaluate the SW London PCO PMS pilot    | Single-site case study (Interviews, Angina Audit, GPAS, Focus groups, Practice Profile Questionnaire, Registration Questionnaire) | Access, interpersonal care, continuity of care, technical care, communication, range of services provided, prescribing, patient profile | Seven practices | ➤ Quality of care provided was felt to be excellent by practice staff but practice scored lower on GPAS than control GMS sites                                               | ➤ Data based on single case study            | III |
| Jenkins, Lewis, Gillam (2001) | To evaluate the North Hillingdon PMS pilot | Single-site case study (Interviews, Angina Audit, GPAS, Focus groups, Practice Profile Questionnaire, Registration Questionnaire) | Access, interpersonal care, continuity of care, technical care, communication, range of services provided, prescribing, patient profile | Three practices | ➤ Staff felt they were providing high quality care                                                                                                                           | ➤ Data based on single case study            | III |
|                               |                                            |                                                                                                                                   |                                                                                                                                         |                 | ➤ Patient satisfaction was variable (higher in the single-handed practices than in the group practices)                                                                      |                                              |     |

## Supplementary information

### GP telephone consultations (TCs)

|                               |                                                                                                                                                                                                              |                                                                                                                                                                                          |                                                                                                                                                                                                                                                        |                                                                                                         |                                                                                                                                                                                                                                                                                                                                                                                                                                                                                                                                                                                                                                       |                                                                                                                                                                                                                                                                                                                                     |    |
|-------------------------------|--------------------------------------------------------------------------------------------------------------------------------------------------------------------------------------------------------------|------------------------------------------------------------------------------------------------------------------------------------------------------------------------------------------|--------------------------------------------------------------------------------------------------------------------------------------------------------------------------------------------------------------------------------------------------------|---------------------------------------------------------------------------------------------------------|---------------------------------------------------------------------------------------------------------------------------------------------------------------------------------------------------------------------------------------------------------------------------------------------------------------------------------------------------------------------------------------------------------------------------------------------------------------------------------------------------------------------------------------------------------------------------------------------------------------------------------------|-------------------------------------------------------------------------------------------------------------------------------------------------------------------------------------------------------------------------------------------------------------------------------------------------------------------------------------|----|
| Car, Sheikh (2003)            | To summarise the evidence evaluating the role of telephones in helping to deliver clinical care                                                                                                              | Systematic review                                                                                                                                                                        | Acceptability to patients & providers, scope for telephone consultations in managing acute/chronic care, quality & safety                                                                                                                              | N/A                                                                                                     | <ul style="list-style-type: none"> <li>➤ Users highly satisfied with TCs</li> <li>➤ Many clinicians value the convenience of TCs but there is some concern regarding the lack of visual cues and the inability to examine</li> </ul>                                                                                                                                                                                                                                                                                                                                                                                                  | <ul style="list-style-type: none"> <li>➤ Authors limited search to Medline and Cochrane Library</li> <li>➤ Studies conducted both within and outside the UK were included making an assessment of context difficult</li> </ul>                                                                                                      | I  |
| McKinstry <i>et al</i> (2002) | To investigate how the use of telephone consultations impacts on the management of requests for same-day appointments, on resource use, indicators of clinical care and patient perceptions of consultations | RCT (patients who used the telephone to request same-day appointments were randomly allocated to 2 groups: face-to-face same-day consultation or GP returned phone call later to triage) | Use of doctors' time, subsequent use of investigations & services in the two-week period following consultation, frequency of blood pressure measurement, antibiotic prescriptions, number of problems considered at consultation, patient perceptions | 388 (full data collected for 379)                                                                       | <ul style="list-style-type: none"> <li>➤ TCs took less time (8.2 minutes vs 6.7 minutes; diff = 1.5, 95% CI = 0.6 to 2.4, <math>P = 0.002</math>)</li> <li>➤ Patients consulting by telephone re-consulted more frequently in following 2 weeks (0.6 vs 0.4; diff = 0.2, 95% CI = 0 to 0.3; <math>P = 0.01</math>) but no difference was found for use of out-of-hours care or Accident &amp; Emergency</li> <li>➤ No significant differences between TCs and face-to-face consultations for any other outcome measures</li> <li>➤ More patients in the intervention arm claimed they were likely to use TCs in the future</li> </ul> | <ul style="list-style-type: none"> <li>➤ Small study</li> <li>➤ Response rate 47.9%</li> <li>➤ Participants were already 'callers' (people who <i>called</i> were allocated into either group)</li> <li>➤ Study not powered to detect secondary outcomes</li> <li>➤ No consideration of GP telephone consultation skills</li> </ul> | I  |
| Brown, Armstrong (1995)       | To assess the characteristics of patients using the telephone to consult the GP and whether telephone consultations were used as an additional or an alternative service to surgery consultations            | Case-control study (Questionnaire)                                                                                                                                                       | Perceptions and attitudes regarding telephone consultations, characteristics of those accessing telephone consultations                                                                                                                                | 259 patients in both case and control groups (but 81 patients in the control group were later excluded) | <ul style="list-style-type: none"> <li>➤ Those who consulted the GP by telephone were significantly more likely to be aware of the phone-in clinic, to have a telephone at home, to have children aged under 5 years at home, to be receiving repeat prescriptions</li> <li>➤ 5% (11) indicated that they would not have made a GP appointment or requested a home visit; 53% (120) used the telephone as an alternative to a surgery appointment; 10% (22) used the telephone instead of requesting a home visit</li> </ul>                                                                                                          | <ul style="list-style-type: none"> <li>➤ Single-site study</li> <li>➤ Control group smaller than intervention group</li> <li>➤ Questionnaire asks patients about consultations up to one year ago</li> <li>➤ Sampling method unknown</li> </ul>                                                                                     | II |
| Hallam (1993)                 | To determine accessibility of surgeries and GPs by telephone                                                                                                                                                 | Case studies (Postal survey to patients of four general practices [part of                                                                                                               | Demographic characteristics of callers, caller                                                                                                                                                                                                         | 2887 patients randomly selected; a                                                                      | <ul style="list-style-type: none"> <li>➤ Over 50% of participants were unable to get through to the surgery on their first attempt</li> </ul>                                                                                                                                                                                                                                                                                                                                                                                                                                                                                         | <ul style="list-style-type: none"> <li>➤ Gender imbalance in response rates</li> <li>➤ One practice dropped out</li> </ul>                                                                                                                                                                                                          | II |

## Supplementary information

|                                      |                                                                                                                                                            |                                                                                                                                                   |                                                                                                                                                                                         |                                                                                                                    |                                                                                                                                                                                                                                                                                                                                                                                                                               |                                                                                                                                                                                                                                                                                                           |     |
|--------------------------------------|------------------------------------------------------------------------------------------------------------------------------------------------------------|---------------------------------------------------------------------------------------------------------------------------------------------------|-----------------------------------------------------------------------------------------------------------------------------------------------------------------------------------------|--------------------------------------------------------------------------------------------------------------------|-------------------------------------------------------------------------------------------------------------------------------------------------------------------------------------------------------------------------------------------------------------------------------------------------------------------------------------------------------------------------------------------------------------------------------|-----------------------------------------------------------------------------------------------------------------------------------------------------------------------------------------------------------------------------------------------------------------------------------------------------------|-----|
|                                      |                                                                                                                                                            | a three-phase study looking at telephone use in general practice] and practice profiles)                                                          | satisfaction, call outcome, knowledge of GP accessibility by telephone                                                                                                                  | further 916 purposively selected                                                                                   | <ul style="list-style-type: none"> <li>➤ Half of the participants knew that they could access their GP by telephone</li> <li>➤ Patients were highly satisfied with care received over the phone but dissatisfied with the process</li> </ul>                                                                                                                                                                                  | <ul style="list-style-type: none"> <li>➤ Practices were 'high telephone use' practices at baseline</li> <li>➤ Differences among practices in patient to telephone line ratio</li> <li>➤ Role of receptionists unknown</li> </ul>                                                                          |     |
| Jiwa, Mathers, Campbell (2002)       | To determine if GP telephone triage can reduce demand for face-to-face consultations for patients seeking same-day appointments                            | Interrupted time series (2 years before and 1 year after introduction of GP phone consultations)                                                  | Demand for extra appointments, patient satisfaction, impact of consultation                                                                                                             | 614 calls                                                                                                          | <ul style="list-style-type: none"> <li>➤ TC outcome: 43% of callers were offered same-day appointment, 22% called for repeat prescriptions, 29% for advice only, 2% requested a home visit, 4% were routine appointments</li> <li>➤ 98% of patients judged TC an acceptable alternative</li> <li>➤ Demand for face-to-face consultations with GP was reduced by 39% (95% CI = 29 to 51, <math>P &lt; 0.001</math>)</li> </ul> | <ul style="list-style-type: none"> <li>➤ Single-case study with no control group</li> <li>➤ Patients not followed-up post-consultation</li> <li>➤ Instrument used to measure patient satisfaction not specified</li> </ul>                                                                                | III |
| <b>Nurse telephone consultations</b> |                                                                                                                                                            |                                                                                                                                                   |                                                                                                                                                                                         |                                                                                                                    |                                                                                                                                                                                                                                                                                                                                                                                                                               |                                                                                                                                                                                                                                                                                                           |     |
| Lattimer <i>et al</i> (1998)         | To determine the safety and effectiveness of nurse telephone consultation in out-of-hours care by investigating adverse events and the management of calls | Blocked RCT (within each 'block' one of each pair of randomised periods was randomly allocated to receive the intervention or the normal service) | Deaths within 7 days of contact, emergency hospital admissions within 24 hours and 3 days, attendance at Accident & Emergency within 3 days; number and management of calls in each arm | 10 134 callers; 14 492 calls (7308 in the control arm, 7184 in the intervention arm) concerning 10 134 individuals | <ul style="list-style-type: none"> <li>➤ Nurses managed 50% of calls without referral to GP</li> <li>➤ 69% reduction in telephone advice from GP; 38% reduction in attendance at health centres; 23% reduction in home visits</li> <li>➤ Statistical equivalence between the number of deaths within 7 days, number of emergency hospital admissions, number of attendances at Accident &amp; Emergency</li> </ul>            | <ul style="list-style-type: none"> <li>➤ Looks at out-of-hours care only</li> <li>➤ Authors only considered whether nurse intervention produced worse results than GP</li> <li>➤ Differences in death rates between the groups are calculated but results do not distinguish reasons for death</li> </ul> | I   |
| Thompson <i>et al</i> (1999)         | To establish whether nurse telephone consultation was equally effective in managing workload at night                                                      | RCT (study is embedded within a larger RCT: Lattimer <i>et al</i> , 1998, as above)                                                               | Number of patients attending daytime surgery within 3 days of a call (plus those in Lattimer, 1998)                                                                                     | 210 callers; 223 calls (123 in control and 100 in nurse consultation group)                                        | <ul style="list-style-type: none"> <li>➤ 59% of calls handled by nurse along (95% CI = 48.7 to 68.7)</li> <li>➤ Percentage of calls ending in GP consultation or home visit significantly reduced</li> <li>➤ Nurses can manage a high percentage of calls at night (as well as during evenings and weekends) without increased numbers of patients attending daytime surgeries</li> </ul>                                     | <ul style="list-style-type: none"> <li>➤ Small sample</li> <li>➤ Authors only considered whether nurse intervention produced worse results than GP</li> <li>➤ Trial not powered to detect rare adverse events</li> </ul>                                                                                  | I   |

## Supplementary information

|                                      |                                                                                                                                                                                        |                                                                                                                                                                              |                                                                                                                                                                                                  |                                                                        |                                                                                                                                                                                                                                                                                                                                                                                                                                                                                                                     |                                                                                                                                                                                                                                                       |     |
|--------------------------------------|----------------------------------------------------------------------------------------------------------------------------------------------------------------------------------------|------------------------------------------------------------------------------------------------------------------------------------------------------------------------------|--------------------------------------------------------------------------------------------------------------------------------------------------------------------------------------------------|------------------------------------------------------------------------|---------------------------------------------------------------------------------------------------------------------------------------------------------------------------------------------------------------------------------------------------------------------------------------------------------------------------------------------------------------------------------------------------------------------------------------------------------------------------------------------------------------------|-------------------------------------------------------------------------------------------------------------------------------------------------------------------------------------------------------------------------------------------------------|-----|
| Pinnock, <i>et al</i> (2003)         | To determine whether routine review by telephone of patients with asthma improves access and is a good alternative to face-to-face reviews in general practice                         | Pragmatic RCT                                                                                                                                                                | Proportion of patients reviewed within 3 months of randomisation, disease specific quality of life, asthma morbidity, nursing care satisfaction, length of consultation                          | Four general practices (278 adults)                                    | <ul style="list-style-type: none"> <li>➤ within next 3 days</li> <li>➤ At 3 months, 74% of those in intervention arm had been reviewed, compared with 48% of those in control arm (95% CI = 14 to 37, <math>P &lt; 0.001</math>)</li> <li>➤ The measure of disease specific quality of life (Juniper score) did not differ between the two groups</li> <li>➤ Telephone consultations were 10 minutes shorter than those conducted face-to-face (95% CI = 12.6 to 8.8 minutes, <math>P &lt; 0.001</math>)</li> </ul> | <ul style="list-style-type: none"> <li>➤ Not blinded</li> <li>➤ Practices 'asthma-interested' and more motivated</li> <li>➤ Participants slightly older than eligible population</li> <li>➤ Study was of a short-duration</li> </ul>                  | I   |
| Richards <i>et al</i> (2002)         | To compare the workloads of GPs and nurses, and costs of patient care for nurse telephone triage and standard management of requests for same-day appointments in routine primary care | Multiple interrupted time series (using sequential introduction of experimental triage system in different sites with repeated measures taken for 1 week in every 12 months) | Type of consultation, time taken for consultation, presenting complaints, use of services during month and after same-day contact, costs of drugs, same-day care, follow-up care, emergency care | 4685 patients (1233 standard management; 3452 in triage system)        | <ul style="list-style-type: none"> <li>➤ Nurse telephone triage (NTT) smoothed out peaks and troughs of unplanned GP workload</li> <li>➤ NTT reduced the number of face-to-face GP consultations (29–44%) and house-visits, increased telephone care (2.41) nurse care (3.79) (40% of patients managed by nurses), and follow up attendance at out-of-hours or Accident &amp; Emergency</li> </ul>                                                                                                                  | <ul style="list-style-type: none"> <li>➤ Three times as many patients in intervention over control group</li> <li>➤ Trial not powered to detect rare adverse events</li> <li>➤ No measure of consultation content</li> </ul>                          | III |
| Gallagher, Huddart, Henderson (1998) | To determine the impact of telephone triage, conducted by a practice nurse, on the management of same-day consultations in a general practice                                          | Prospective case study (routine data and patient postal survey)                                                                                                              | Number of consultations, call outcome, patient satisfaction                                                                                                                                      | Data collection on practice of 11 300 patients<br>Survey: 284 patients | <ul style="list-style-type: none"> <li>➤ Doctor workloads fell by 54% over 3 months compared to the 3 months before the study</li> <li>➤ 26% of calls were managed by the nurse without a GP following GP consultation</li> <li>➤ 88% of patients were satisfied with nurse telephone advice</li> </ul>                                                                                                                                                                                                             | <ul style="list-style-type: none"> <li>➤ Short-term study conducted in part over a holiday period</li> <li>➤ Study not powered to detect rare adverse outcomes</li> <li>➤ Patient questionnaire 10 months after consultation (recall bias)</li> </ul> | III |
| <b>Nurse practitioner-led care</b>   |                                                                                                                                                                                        |                                                                                                                                                                              |                                                                                                                                                                                                  |                                                                        |                                                                                                                                                                                                                                                                                                                                                                                                                                                                                                                     |                                                                                                                                                                                                                                                       |     |
| Horrocks, Anderson, Salisbury (2002) | To determine whether nurse practitioners can provide care at first point of contact equivalent to doctors in primary care                                                              | Systematic review                                                                                                                                                            | N/A                                                                                                                                                                                              | N/A                                                                    | <ul style="list-style-type: none"> <li>➤ Patients were more satisfied with care by a nurse practitioner (standard mean diff = 0.27, 95% CI = 0.07 to 0.47)</li> <li>➤ No differences in health status found</li> <li>➤ Nurses gave longer consultations (mean diff = 3.67 minutes,</li> </ul>                                                                                                                                                                                                                       | <ul style="list-style-type: none"> <li>➤ Heterogeneity across outcome measures</li> <li>➤ Studies conducted both within and outside the UK were included making an assessment of context difficult</li> </ul>                                         | I   |

## Supplementary information

|                                |                                                                                                                                                    |                                                              |                                                                                                                                                                                         |                                                  |                                                                                                                                                                                                                                                                                                                                                                                                                                                                                                                                                                                                                                                                                                               |                                                                                                                                                                                                                                                                                                                          |   |
|--------------------------------|----------------------------------------------------------------------------------------------------------------------------------------------------|--------------------------------------------------------------|-----------------------------------------------------------------------------------------------------------------------------------------------------------------------------------------|--------------------------------------------------|---------------------------------------------------------------------------------------------------------------------------------------------------------------------------------------------------------------------------------------------------------------------------------------------------------------------------------------------------------------------------------------------------------------------------------------------------------------------------------------------------------------------------------------------------------------------------------------------------------------------------------------------------------------------------------------------------------------|--------------------------------------------------------------------------------------------------------------------------------------------------------------------------------------------------------------------------------------------------------------------------------------------------------------------------|---|
| Venning <i>et al</i> (2000)    | To compare the cost effectiveness of GPs and NPs as first point of contact in primary care                                                         | RCT                                                          | Consultation process, patient satisfaction, health status, return clinic visits, costs                                                                                                  | 1292 patients                                    | <p>2.95–5.29) and made more investigations (OR = 1.22, 1.02–1.46); no differences in prescriptions, return consultations and referrals</p> <ul style="list-style-type: none"> <li>➤ Patients more satisfied with nurse-led than GP-led consultations (after controlling for consultation length)</li> <li>➤ Nurse-led consultations were longer than GP consultations (11.57 vs 7.28 minutes, adjusted diff = 4.20, 95% CI = 2.98 to 5.41); NPs carried out more tests (8.7% vs 5.6%, OR = 1.66, 95% CI = 1.04 to 2.66), NPs asked patients to return more often (37.2 vs 24.8%, OR = 1.93, 95% CI=1.36 to 2.73)</li> <li>➤ No significant difference in patterns of prescribing or health outcome</li> </ul> | <ul style="list-style-type: none"> <li>➤ Study only considers nurses who work alongside GPs</li> <li>➤ Study is not powered to detect rare adverse outcomes</li> <li>➤ Study nurses and GPs may be more motivated as their care is being monitored</li> <li>➤ Content of consultations not measured</li> </ul>           | I |
| Shum <i>et al</i> (2000)       | To assess the acceptability and safety of a minor illness service led by practice nurses in general practice                                       | RCT (multi-centre)                                           | Patient satisfaction, length of consultation, number of prescriptions, referral and re-consultation rates, health status, patients' anticipated behaviour in seeking future health care | 1815 patients (requesting same-day appointments) | <ul style="list-style-type: none"> <li>➤ NP care produced greater patient satisfaction</li> <li>➤ 73% of nurse-led care was managed without GP input</li> <li>➤ No significant difference was found between nurse and GP prescribing, referral rates, re-consultation patterns, or adverse health outcome</li> <li>➤ Nurse-led consultations were on average 2 minutes longer than GP consultations</li> </ul>                                                                                                                                                                                                                                                                                                | <ul style="list-style-type: none"> <li>➤ Content of consultations not measured</li> <li>➤ Study is not powered to detect rare adverse outcomes</li> <li>➤ Study nurses and GPs may be more motivated as their care is being monitored</li> </ul>                                                                         | I |
| Kinnersley <i>et al</i> (2000) | To ascertain any differences between care from nurse practitioners and that from GPs for patients seeking 'same-day' consultations in primary care | RCT (patients allocated to one of two randomisation schemes) | Patient satisfaction, resolution of symptoms/concerns, care/info provided, patients' intentions for seeking care in future                                                              | 10 practices; 1368 patients                      | <ul style="list-style-type: none"> <li>➤ Generally patients consulting nurses where more satisfied with their care; for children the mean difference in satisfaction score = -4.8 (95% CI = -6.8 to -2.8), (for adults not significant)</li> <li>➤ Resolution of symptoms and concerns did not differ between the two groups (OR = 1.2, 95% CI = 0.8 to 1.8)</li> <li>➤ The number of prescriptions issued, investigations ordered, referrals to</li> </ul>                                                                                                                                                                                                                                                   | <ul style="list-style-type: none"> <li>➤ No demographic data collected on patients which may illuminate results; no sub-group analyses</li> <li>➤ Content of consultations not measured</li> <li>➤ Study is not powered to detect rare adverse outcomes</li> <li>➤ Study nurses and GPs may be more motivated</li> </ul> | I |

## Supplementary information

|                             |                                                                                                                                                 |                                                                                             |                                                                                                                                                                                                                      |                                                                                                |                                                                                                                                                                                                                                                                                                                                                                                                                                                                                                         |                                                                                                                                                                                                                                                                                                                                                                                               |    |
|-----------------------------|-------------------------------------------------------------------------------------------------------------------------------------------------|---------------------------------------------------------------------------------------------|----------------------------------------------------------------------------------------------------------------------------------------------------------------------------------------------------------------------|------------------------------------------------------------------------------------------------|---------------------------------------------------------------------------------------------------------------------------------------------------------------------------------------------------------------------------------------------------------------------------------------------------------------------------------------------------------------------------------------------------------------------------------------------------------------------------------------------------------|-----------------------------------------------------------------------------------------------------------------------------------------------------------------------------------------------------------------------------------------------------------------------------------------------------------------------------------------------------------------------------------------------|----|
|                             |                                                                                                                                                 |                                                                                             |                                                                                                                                                                                                                      |                                                                                                | <ul style="list-style-type: none"> <li>secondary care and re-attendances were similar between the 2 groups</li> <li>➤ Patients managed by nurses reported receiving more information; nurse consultations were longer</li> </ul>                                                                                                                                                                                                                                                                        | as their care is being monitored                                                                                                                                                                                                                                                                                                                                                              |    |
| <b>Walk-in centres</b>      |                                                                                                                                                 |                                                                                             |                                                                                                                                                                                                                      |                                                                                                |                                                                                                                                                                                                                                                                                                                                                                                                                                                                                                         |                                                                                                                                                                                                                                                                                                                                                                                               |    |
| Salisbury, Munro (2002)     | To review international experience with walk-in centres in primary and emergency care and identify relevant lessons for the UK                  | Systematic review                                                                           | N/A                                                                                                                                                                                                                  | N/A                                                                                            | <ul style="list-style-type: none"> <li>➤ Users tend to be affluent and employed</li> <li>➤ Walk-in centres are provide access out-of-hours disproportionately</li> <li>➤ User satisfaction is high and services are seen to be convenient</li> </ul>                                                                                                                                                                                                                                                    | <ul style="list-style-type: none"> <li>➤ Studies conducted both within and outside the UK were included making an assessment of context difficult; walk-in centres outside the UK have been established for diverse reasons (results are not broken down to reflect this)</li> </ul>                                                                                                          | I  |
| Chalder <i>et al</i> (2003) | To assess the impact of NHS walk-in centres on the workload of local Accident & Emergency departments, general practices, out-of-hours services | Time series analysis (of walk-in centres with no-treatment control series in matched sites) | Mean number or rate of consultations per month in the 12 month periods before and after an index date                                                                                                                | 20 Accident & Emergency departments, 40 general practices, 14 out-of-hours services            | <ul style="list-style-type: none"> <li>➤ Non-statistically significant reduction in Accident &amp; Emergency and general practice consultations in sites close to walk-in centres</li> <li>➤ No impact on out-of-hours services near walk-in centres</li> </ul>                                                                                                                                                                                                                                         | <ul style="list-style-type: none"> <li>➤ Practices diverse in terms of size, workload</li> <li>➤ Short follow-up</li> <li>➤ Towns in which services were based differed somewhat in demographic make-up</li> <li>➤ Participation rates among general practices were low and sites providing data were not representative</li> <li>➤ Study based on routine data of dubious quality</li> </ul> | II |
| Hsu <i>et al</i> (2003)     | To assess the effect of an NHS walk-in centre on local primary and emergency health services                                                    | Before-and-after observational study                                                        | Mean daily rate of emergency GP consultations, mean number of half days to the sixth bookable routine appointment, attendance rates at out-of-hours services, minor injuries units, Accident & Emergency departments | 12 general practices in two towns (one with a walk-in centre and one without a walk-in centre) | <ul style="list-style-type: none"> <li>➤ Mean daily rate of emergency GP consultations, time to sixth bookable appointment and attendance rates at out-of-hours services were not significantly different between intervention and control practices</li> <li>➤ Attendance at the minor injuries unit was higher in the intervention town (RR = 1.22, 95% CI = 1.12 to 1.33)</li> <li>➤ Non-ambulance attendances at Accident &amp; Emergency fell less in the intervention town (RR = 1.17;</li> </ul> | <ul style="list-style-type: none"> <li>➤ Practices diverse in terms of size, workload</li> <li>➤ Study has limited power to detect clinical differences</li> <li>➤ Changes in study population over time makes interpretation difficult</li> </ul>                                                                                                                                            | II |

## Supplementary information

|                               |                                                                                                                      |                                                                                                                                                                                                                                                             |                                                                                                                                                                |                                                                                                  |                                                                                                                                                                                                                                                                                                                                                                                                                                                            |                                                                                                                                                                                                                                                                                                                   |     |
|-------------------------------|----------------------------------------------------------------------------------------------------------------------|-------------------------------------------------------------------------------------------------------------------------------------------------------------------------------------------------------------------------------------------------------------|----------------------------------------------------------------------------------------------------------------------------------------------------------------|--------------------------------------------------------------------------------------------------|------------------------------------------------------------------------------------------------------------------------------------------------------------------------------------------------------------------------------------------------------------------------------------------------------------------------------------------------------------------------------------------------------------------------------------------------------------|-------------------------------------------------------------------------------------------------------------------------------------------------------------------------------------------------------------------------------------------------------------------------------------------------------------------|-----|
| Grant <i>et al</i> (2002)     | To compare the quality of clinical care in walk-in centre with that provided in general practice and by NHS Direct   | Observational study (clinical assessment using standardised patients and five scenarios)                                                                                                                                                                    | Mean scores on checklists of essential items for the management of the clinical scenarios (post-coital contraception, chest pain, sinusitis, headache, asthma) | 20 walk-in centres, 20 general practices, 11 NHS Direct sites; 297 consults — 99 in each setting | <p>95% CI = 1.03 to 1.33).</p> <ul style="list-style-type: none"> <li>➤ Walk-in centres achieved a significantly greater mean score for all scenarios combined than GPs (diff = 8.2 95% CI = 1.7 to 14.6), especially post-coital contraception and asthma</li> <li>➤ Walk-in centres referred a higher percentage of patients (26 vs 82%)</li> </ul>                                                                                                      | <ul style="list-style-type: none"> <li>➤ Non-random sampling of sites (bias)</li> <li>➤ Small sample</li> <li>➤ Limited number of conditions investigated; care generally cannot be interpreted as safe/ of high quality</li> <li>➤ Study did not assess other potential strengths of general practice</li> </ul> | III |
| Salisbury <i>et al</i> (2002) | To determine the characteristics and experiences of people consulting walk-in centres compared with general practice | Observational study (pre/post consultation questionnaire) based on data from National Evaluation                                                                                                                                                            | Sociodemographic characteristics, reasons for consulting, attitudes to continuity, satisfaction, enablement, referrals, intentions                             | 6229 participants across 38 walk-in centres and 34 general practices                             | <ul style="list-style-type: none"> <li>➤ Users are more likely to be male, to have education beyond age 18 years, less likely to be from a black or minority ethnic group; 80% live locally; almost all registered with GP</li> <li>➤ Patient satisfaction is higher at walk-in centre than general practice</li> <li>➤ Users attended because of convenience, felt their GPs were too busy, anonymity</li> </ul>                                          | <ul style="list-style-type: none"> <li>➤ Questionnaire used to measure satisfaction is of unknown reliability and validity</li> </ul>                                                                                                                                                                             | III |
| Salisbury <i>et al</i> (2002) | To assess the success of walk-in centres against five criteria                                                       | National evaluation (analysis of monitoring returns and anonymised patient data; questionnaire survey and follow-up survey of users; quantitative cases studies; survey of health professionals; assessment of quality of care using standardised patients) | Improved access to health care, quality, appropriateness, impact on other NHS providers, efficiency                                                            | 38 walk-in centres                                                                               | <ul style="list-style-type: none"> <li>➤ Walk-in centres scored a higher mean score for essential items conducted than GP or NHS Direct; asthma and post-coital contraception were conducted better in walk-in centres; walk-in centres achieved higher scores in relation to history-taking</li> <li>➤ Half of users consulted a GP within next 4 weeks</li> <li>➤ No significant differences in workload of other local primary care services</li> </ul> | <ul style="list-style-type: none"> <li>➤ Limited number of conditions investigated; care generally cannot be interpreted as safe/of high quality</li> <li>➤ Study nurses and GPs may be more motivated as their care is being monitored</li> </ul>                                                                | [?] |
| Munro <i>et al</i> (2000)     | To review the existing research on walk-in centres                                                                   | Literature review                                                                                                                                                                                                                                           | N/A                                                                                                                                                            | N/A                                                                                              | <ul style="list-style-type: none"> <li>➤ Annual attendance of 10000 patients</li> <li>➤ Walk-in centre users tend to be children and young adults, registered with a GP and better-off</li> <li>➤ 50% of users consult out-of hours</li> <li>➤ Presenting complaints: 65–80%</li> </ul>                                                                                                                                                                    | <ul style="list-style-type: none"> <li>➤ Studies conducted both within and outside the UK were included making an assessment of context difficult</li> </ul>                                                                                                                                                      | III |



## Supplementary information

|                           |                                                                                                        |                                                                                       |                                                                                                                                                  |                                                                                       |                                                                                                                                                                                                                                                                                                                                                                                                                                                                                                                                                                                                                                                                                                   |                                                                                                                                                                                                                                                                         |     |
|---------------------------|--------------------------------------------------------------------------------------------------------|---------------------------------------------------------------------------------------|--------------------------------------------------------------------------------------------------------------------------------------------------|---------------------------------------------------------------------------------------|---------------------------------------------------------------------------------------------------------------------------------------------------------------------------------------------------------------------------------------------------------------------------------------------------------------------------------------------------------------------------------------------------------------------------------------------------------------------------------------------------------------------------------------------------------------------------------------------------------------------------------------------------------------------------------------------------|-------------------------------------------------------------------------------------------------------------------------------------------------------------------------------------------------------------------------------------------------------------------------|-----|
|                           |                                                                                                        |                                                                                       |                                                                                                                                                  |                                                                                       | <ul style="list-style-type: none"> <li>➤ were minor illnesses; 20–35% were minor injuries</li> <li>➤ Walk-in centres are likely to be able to deal with 90% of presenting complaints</li> <li>➤ Walk-in centres are popular with patients (rapid access, convenient times/locations, no need for appointment)</li> <li>➤ Satisfaction with nurse-led services is at least as high as that for doctor-led services</li> </ul>                                                                                                                                                                                                                                                                      |                                                                                                                                                                                                                                                                         |     |
| <b>NHS Direct</b>         |                                                                                                        |                                                                                       |                                                                                                                                                  |                                                                                       |                                                                                                                                                                                                                                                                                                                                                                                                                                                                                                                                                                                                                                                                                                   |                                                                                                                                                                                                                                                                         |     |
| Munro <i>et al</i> (2001) | Evaluation of first-wave sites                                                                         | National Evaluation (analysis of routine data)                                        | Activity, clinical assessment, compliance with advice given by NHS Direct, critical event monitoring, economic evaluation, views of stakeholders | Three first-wave sites                                                                | <ul style="list-style-type: none"> <li>➤ NHS Direct is used in 5% of all episodes of ill health where unscheduled care is sought; users tend to be young adults/adults calling on behalf of children</li> <li>➤ Serious adverse effect rates are lower than in other triage settings</li> <li>➤ Users view service as friendly, prompt, professional and advice is seen as practical and helpful; sources of dissatisfaction include difficulties in getting through to service/delays, number of questions asked, inconsistency in quality of self-care advice</li> <li>➤ NHS Direct has had little impact on demand for other services; may have halted demand for out-of-hours care</li> </ul> | <ul style="list-style-type: none"> <li>➤ Study is based on analysis of first-wave sites</li> <li>➤ Rapid development of NHS Direct makes comparison of data from beginning to end of evaluation difficult</li> <li>➤ Study is based entirely on routine data</li> </ul> | III |
| Munro <i>et al</i> (2000) | To quantify the impact of NHS Direct on the use of Accident & Emergency, ambulance and GP cooperatives | Observational study (analysis of routine data) based on data from National Evaluation | Changes in trends in use after the introduction of NHS Direct                                                                                    | 68 500 calls (3 first-wave NHS Direct sites and 6 nearby GP cooperatives as controls) | <ul style="list-style-type: none"> <li>➤ 72% of calls received out of hours</li> <li>➤ 22% of calls on behalf of children aged under 5 years</li> <li>➤ Changes in use of Accident &amp; Emergency and ambulance services after introduction of NHS Direct were not significant</li> <li>➤ Changes in use of GP out of hours services were small but significant (2% per month to -0.8% per month; diff=-2.9%, 95% CI= -4.2 to -1.5%)</li> </ul>                                                                                                                                                                                                                                                  | <ul style="list-style-type: none"> <li>➤ Study is based on analysis of first-wave sites</li> <li>➤ Rapid development of NHS Direct makes comparison of data from beginning to end of evaluation difficult</li> <li>➤ Study is based entirely on routine data</li> </ul> | III |

## Supplementary information

| Pharmacist-led initiatives      |                                                                                                                               |                                                                                                                                                                                                                    |                                                                                                                                                                     |                                                                                        |                                                                                                                                                                                                                                                                                                                                                                                                                                                                                         |                                                                                                                                                                            |     |  |
|---------------------------------|-------------------------------------------------------------------------------------------------------------------------------|--------------------------------------------------------------------------------------------------------------------------------------------------------------------------------------------------------------------|---------------------------------------------------------------------------------------------------------------------------------------------------------------------|----------------------------------------------------------------------------------------|-----------------------------------------------------------------------------------------------------------------------------------------------------------------------------------------------------------------------------------------------------------------------------------------------------------------------------------------------------------------------------------------------------------------------------------------------------------------------------------------|----------------------------------------------------------------------------------------------------------------------------------------------------------------------------|-----|--|
| Munro <i>et al</i> (2001)       | Evaluation of NHS Direct Essex pharmacy pilot                                                                                 | Case study (analysis of routine data and questionnaires)                                                                                                                                                           | Callers experiences and satisfaction, impact on pharmacies, effects on other services which NHS Direct advises callers to use                                       | 107 833 calls included (143 366 calls received in total but no triage record for some) | <ul style="list-style-type: none"> <li>➤ In first 3 months: 6% calls logged as referred to pharmacists; 86% of these felt advice was appropriate</li> <li>➤ When used, the service seemed acceptable to callers</li> <li>➤ Concerns: privacy in pharmacy</li> <li>➤ One-third who consulted pharmacists also consulted their GP with same condition</li> </ul>                                                                                                                          | <ul style="list-style-type: none"> <li>➤ Initiative was only partially implemented</li> <li>➤ Benefits to user not measured</li> </ul>                                     | III |  |
| Hassell <i>et al</i> (2001)     | To examine how referring patients with self-limiting conditions directly to a community pharmacist would affect GP's workload | Before-and-after study (all patients seeking GP appointments or telephone prescriptions for 12 conditions were offered a consultation at a community pharmacy). Data from Whittington <i>et al</i> , 2001 (below). | Transfer rates, reductions in GP consultations for 12 self-limiting conditions together and separately, prescribing outcomes, reconsultation rates                  | One general practice and eight local community pharmacies; 3044 consultations          | <ul style="list-style-type: none"> <li>➤ Overall workload of GPs was unaffected but the workload for the 12 study conditions decreased (<math>P = 0.001</math>, 95% CI = 0.397 to 0.108); 37.8% of the combined consultations were transferred</li> <li>➤ 49% of the patients who consulted a GP were prescribed a drug that could have been provided from pharmacies' limited formulary; eight received prescriptions for products that could be purchases over the counter</li> </ul> | <ul style="list-style-type: none"> <li>➤ Differential waiting times to see GP may have influenced participation decisions</li> <li>➤ Low recruitment rate (38%)</li> </ul> | III |  |
| Whittington <i>et al</i> (2001) | To describe community pharmacy management of minor conditions after referral from one general practice                        | Feasibility study in which all patients seeking a prescription for 12 self-limiting conditions were offered a consultation with a pharmacist (routine data, interviews with pharmacists)                           | Level of transfer to pharmacy management for 12 conditions, patient management within pharmacies (prescribing outcomes, referral to practice, reconsultation rates) | One general practice and eight local community pharmacies; 3044 consultations          | <ul style="list-style-type: none"> <li>➤ The most common presenting complaints were: head lice, vaginal thrush, upper respiratory tract infections (79% of total)</li> <li>➤ Most patients were managed with advice and treatment prescribed from the formulary; 4% of patients were referred back to the practice</li> <li>➤ 6% of patients reconsulted for the same condition within 2 weeks</li> </ul>                                                                               | <ul style="list-style-type: none"> <li>➤ Differential waiting times to see GP may have influenced participation decisions</li> <li>➤ Low recruitment rate (38%)</li> </ul> | III |  |
